# Supplementary material for: Copper-doped metal–organic frameworks for the controlled generation of nitric oxide from endogenous S-nitrosothiols
Source: Royal Society of Chemistry journal article supplement (doi:10.1039/d0tb02709j), 2020-12-21
Supplement: d0tb02709j1.pdf [file d0tb02709j1.pdf]

## Supporting Information

# Copper-Doped Metal-Organic Frameworks for the Controlled Generation of Nitric Oxide from Endogenous S-nitrosothiols

*Yingzhu Zhou,<sup>a</sup> Tao Yang,<sup>a</sup> Rashin Namivandi-Zangeneh,<sup>a,b</sup> Cyrille Boyer,<sup>a,b</sup> Kang Liang<sup>a,c\*</sup> and  
Rona Chandrawati<sup>a\*</sup>*

*<sup>a</sup>School of Chemical Engineering and Australian Centre for Nanomedicine (ACN), The  
University of New South Wales (UNSW Sydney), Sydney, NSW 2052, Australia*

*<sup>b</sup>Cluster for Advanced Macromolecular Design (CAMD), The University of New South Wales  
(UNSW Sydney), Sydney, NSW 2052, Australia*

*<sup>c</sup>Graduate School of Biomedical Engineering, The University of New South Wales (UNSW  
Sydney), Sydney, NSW 2052, Australia*

*\*E-mail: [rona.chandrawati@unsw.edu.au](mailto:rona.chandrawati@unsw.edu.au); [kang.liang@unsw.edu.au](mailto:kang.liang@unsw.edu.au)*

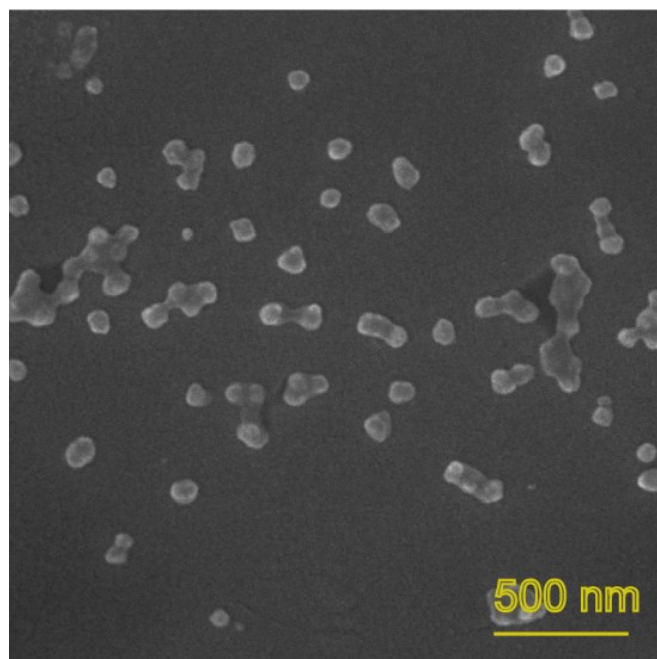

**Figure S1.** SEM image of 20% Cu<sup>2+</sup>/ZIF-8 (0.1 mg mL<sup>-1</sup>) after reaction with GSNO (50 μM) in PBS for 24 h.
